# Supplementary material for: Nrf2 Plays an Essential Role in Long-Term Brain Damage and Neuroprotection of Korean Red Ginseng in a Permanent Cerebral Ischemia Model
Source: PubMed Central journal article supplement (PMC6721128; doi:10.3390/antiox8080273), 2019-08-03
Supplement: antioxidants-08-00273-s001.pdf [file antioxidants-08-00273-s001.pdf]

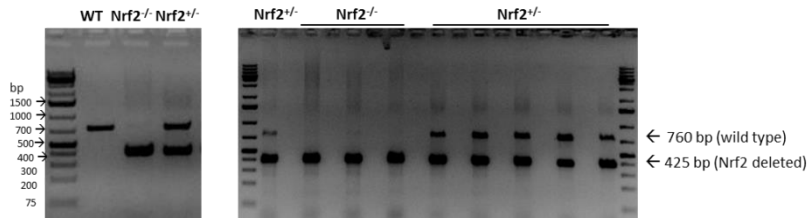

**Supplementary Figure 1 The standard PCR genotyping of *Nrf2*<sup>-/-</sup> mice.** Ear punch samples from *Nrf2*<sup>-/-</sup> mice were subjected to genotyping analysis. Using genomic DNA, the absence of 760 bp band and the detection of 425 bp band indicate the successful deletion of *Nrf2* gene in the *Nrf2*<sup>-/-</sup> mice. Primers sequences: WT Forward, 5'-CGC CTT TTC AGT AGA TGG AGG-3'; *Nrf2* Forward, 5'-GCG GAT TGA CCG TAA TGG GAT AGG-3'; Reverse, 5'-TGG ACG GGA CTA TTG AAG GCT G-3'.
